# Supplementary material for: Donor-substituted triaryl-1,3,5-triazinanes-2,4,6-triones: octupolar NLO-phores with a remarkable transparency–nonlinearity trade-off
Source: Royal Society of Chemistry journal article supplement (doi:10.1039/c1nj20442d), 2011-01-01
Supplement: c1nj20442d.pdf [file c1nj20442d.pdf]

## Supporting Information

*Gilles Argouarch, Romain Veillard, Thierry Roisnel, Anissa Amar, Abdou Boucekkine, Anu Singh, Isabelle Ledoux\* and Frédéric Paul\**

**Donor-substituted Triaryl-1,3,5-Triazines-2,4,6-Triones: Octupolar NLO-phores with a Remarkable Transparency–Nonlinearity Trade-off**

**Including:**

- |                                                       |       |
|-------------------------------------------------------|-------|
| <b>1. NLO Measurements</b>                            | p. S2 |
| <b>2. Crystal data and structure refinement for 4</b> | p. S3 |

## 1. NLO Measurements

The first hyperpolarizabilities were determined by performing hyper-Raleigh scattering (HRS) experiments in  $\text{CH}_2\text{Cl}_2$  solutions. This technique is based on the analysis of the incoherent light scattered second-harmonic signal from an isotropic medium. The scattered nonlinear intensity  $I^{2\omega}$  can be expressed as  $I^{2\omega} = C(N_S\langle\beta_S^2\rangle + N\langle\beta^2\rangle)(I^\omega)^2$  for a solution containing  $N$  chromophores dissolved in  $N_S$  solvent molecules (concentrations expressed per milliliter of solution), where the  $C$  coefficient represents geometrical factors and experimental terms. The brackets refer to orientationally averaged  $\beta$  values. The  $C$  scaling factor is empirically deduced by a calibration experiment using a reference.

HRS measurements were conducted with a single-mode Nd:YAG laser emitting pulses of 10-MW peak power and 10-ns duration at 10-Hz repetition rate. The incident intensity  $I^\omega$  is monitored by a half-wave plate and a Glan polarizer. A fraction of the incident beam is extracted from the main beam by a glass plate and sent onto a reference NPP frequency doubling calibrated powder. The fundamental beam is focused in a cell which contains the solution. The scattered harmonic signal is then collected at a right angle on a second photomultiplier after spectral selection through an interferential filter with 3-nm spectral resolution. For measurements performed in chloroform, the solvent was taken as reference, with a  $\langle\beta_S^2\rangle^{1/2}$  value of  $0.19 \cdot 10^{-30}$  esu at  $1.064 \mu\text{m}$ . For measurements effected in dichloromethane, ethyl violet was taken as an external reference standard with a  $\langle\beta^2\rangle^{1/2}$  value of  $170 \cdot 10^{-30}$  esu at  $1.907 \mu\text{m}$ . In both cases, *ca.*  $10^{-3}$  M solutions were used. Note that the excitation wavelength was chosen so as not to allow two-photon excitation of any of the chromophores examined, *i.e.* at a much longer wavelength than twice the their absorption wavelength. The experimental accuracy is estimated to be  $\pm 15\%$ .

## 2. Crystal data and structure refinement for 4

|                                   |                                                                                                                     |
|-----------------------------------|---------------------------------------------------------------------------------------------------------------------|
| Empirical formula                 | $C_{27}H_{15}N_3O_3$                                                                                                |
| Formula weight                    | 429.42                                                                                                              |
| Temperature                       | 100(2) K                                                                                                            |
| Wavelength                        | 0.71073 Å                                                                                                           |
| Crystal system, space group       | Trigonal, R 3 c                                                                                                     |
| Unit cell dimensions              | $a = 13.5264(13)$ Å $\alpha = 90$ deg.<br>$b = 13.526$ Å $\beta = 90$ deg.<br>$c = 24.608(2)$ Å $\gamma = 120$ deg. |
| Volume                            | $3899.2(5)$ Å <sup>3</sup>                                                                                          |
| Z, Calculated density             | 6, 1.097 Mg/m <sup>3</sup>                                                                                          |
| Absorption coefficient            | $0.073$ mm <sup>-1</sup>                                                                                            |
| F(000)                            | 1332                                                                                                                |
| Crystal size                      | $0.25 \times 0.23 \times 0.15$ mm                                                                                   |
| Theta range for data collection   | 3.01 to 27.48 deg.                                                                                                  |
| Limiting indices                  | $-16 \leq h \leq 17$ , $-17 \leq k \leq 16$ , $-25 \leq l \leq 31$                                                  |
| Reflections collected / unique    | 7587 / 1002 [R(int) = 0.0576]                                                                                       |
| Completeness to theta = 27.48     | 99.8 %                                                                                                              |
| Absorption correction             | Semi-empirical from equivalents                                                                                     |
| Max. and min. transmission        | 0.989 and 0.975                                                                                                     |
| Refinement method                 | Full-matrix least-squares on F <sup>2</sup>                                                                         |
| Data / restraints / parameters    | 1002 / 1 / 100                                                                                                      |
| Goodness-of-fit on F <sup>2</sup> | 1.162                                                                                                               |
| Final R indices [I > 2σ(I)]       | R1 = 0.0693, wR2 = 0.1716                                                                                           |
| R indices (all data)              | R1 = 0.0720, wR2 = 0.1732                                                                                           |
| Absolute structure parameter      | -10(10)                                                                                                             |
| Largest diff. peak and hole       | 0.326 and -0.320 e.Å <sup>-3</sup>                                                                                  |

**Atomic coordinates ( $\times 10^4$ ) and equivalent isotropic displacement parameters ( $\text{\AA}^2 \times 10^3$ )**

**for 4.  $U(\text{eq})$  is defined as one third of the trace of the orthogonalized  $U_{ij}$  tensor.**

---

|       | x       | y       | z       | U(eq) |
|-------|---------|---------|---------|-------|
| C(1)  | 6523(4) | 1102(5) | 5364(2) | 36(1) |
| C(2)  | 5566(4) | 931(4)  | 5309(2) | 25(1) |
| C(3)  | 4414(3) | 716(3)  | 5224(2) | 25(1) |
| C(4)  | 4067(4) | 852(4)  | 4725(2) | 25(1) |
| C(5)  | 2953(3) | 654(3)  | 4622(2) | 22(1) |
| C(6)  | 3648(3) | 358(4)  | 5659(2) | 24(1) |
| C(7)  | 2538(4) | 158(3)  | 5587(2) | 24(1) |
| C(8)  | 2223(3) | 322(3)  | 5072(2) | 17(1) |
| N(9)  | 1079(3) | 149(3)  | 4991(2) | 19(1) |
| C(10) | 966(3)  | 1123(3) | 5012(2) | 17(1) |
| O(10) | 1777(2) | 2072(2) | 5053(1) | 22(1) |

---

**Bond lengths [Å] and angles [deg] for 4.**

---

|                |          |
|----------------|----------|
| C(1)-C(2)      | 1.203(6) |
| C(1)-H(1)      | 0.9500   |
| C(2)-C(3)      | 1.450(6) |
| C(3)-C(4)      | 1.359(7) |
| C(3)-C(6)      | 1.398(6) |
| C(4)-C(5)      | 1.415(6) |
| C(4)-H(4)      | 0.9500   |
| C(5)-C(8)      | 1.401(6) |
| C(5)-H(5)      | 0.9500   |
| C(6)-C(7)      | 1.398(6) |
| C(6)-H(6)      | 0.9500   |
| C(7)-C(8)      | 1.388(6) |
| C(7)-H(7)      | 0.9500   |
| C(8)-N(9)      | 1.460(5) |
| N(9)-C(10)#1   | 1.396(5) |
| N(9)-C(10)     | 1.401(5) |
| C(10)-O(10)    | 1.206(5) |
| C(10)-N(9)#2   | 1.396(5) |
|                |          |
| C(2)-C(1)-H(1) | 180.0    |
| C(1)-C(2)-C(3) | 178.2(6) |
| C(4)-C(3)-C(6) | 119.5(4) |
| C(4)-C(3)-C(2) | 120.8(4) |
| C(6)-C(3)-C(2) | 119.7(4) |
| C(3)-C(4)-C(5) | 123.0(4) |
| C(3)-C(4)-H(4) | 118.5    |
| C(5)-C(4)-H(4) | 118.5    |
| C(8)-C(5)-C(4) | 115.5(4) |
| C(8)-C(5)-H(5) | 122.2    |
| C(4)-C(5)-H(5) | 122.2    |

|                    |          |
|--------------------|----------|
| C(7)-C(6)-C(3)     | 120.5(4) |
| C(7)-C(6)-H(6)     | 119.8    |
| C(3)-C(6)-H(6)     | 119.8    |
| C(8)-C(7)-C(6)     | 118.1(4) |
| C(8)-C(7)-H(7)     | 120.9    |
| C(6)-C(7)-H(7)     | 120.9    |
| C(7)-C(8)-C(5)     | 123.3(4) |
| C(7)-C(8)-N(9)     | 119.0(4) |
| C(5)-C(8)-N(9)     | 117.6(4) |
| C(10)#1-N(9)-C(10) | 123.8(4) |
| C(10)#1-N(9)-C(8)  | 118.0(3) |
| C(10)-N(9)-C(8)    | 116.8(3) |
| O(10)-C(10)-N(9)#2 | 121.7(3) |
| O(10)-C(10)-N(9)   | 122.3(4) |
| N(9)#2-C(10)-N(9)  | 115.9(4) |

---

Symmetry transformations used to generate equivalent atoms:

#1 -x+y,-x,z #2 -y,x-y,z

**Anisotropic displacement parameters ( $\text{\AA}^2 \times 10^3$ ) for 4.**

The anisotropic displacement factor exponent takes the form:  $-2 \pi^2 [ h^2 a^{*2} U_{11} + \dots + 2 h k a^* b^* U_{12} ]$

---

|       | U11   | U22   | U33   | U23   | U13   | U12   |
|-------|-------|-------|-------|-------|-------|-------|
| C(1)  | 17(2) | 46(3) | 48(3) | 13(2) | 2(2)  | 18(2) |
| C(2)  | 18(2) | 30(2) | 28(2) | 8(2)  | 4(2)  | 12(2) |
| C(3)  | 16(2) | 17(2) | 44(3) | 3(2)  | 0(2)  | 11(2) |
| C(4)  | 20(2) | 23(2) | 27(2) | 1(2)  | 9(2)  | 7(2)  |
| C(5)  | 20(2) | 16(2) | 28(2) | 3(2)  | 5(2)  | 8(2)  |
| C(6)  | 17(2) | 25(2) | 28(2) | 6(2)  | 1(2)  | 10(2) |
| C(7)  | 18(2) | 20(2) | 36(2) | 2(2)  | 6(2)  | 11(2) |
| C(8)  | 10(2) | 8(2)  | 31(2) | -3(2) | -2(1) | 4(1)  |
| N(9)  | 14(2) | 18(2) | 27(2) | 4(1)  | 2(1)  | 9(1)  |
| C(10) | 16(2) | 12(2) | 23(2) | -1(1) | -4(2) | 8(2)  |
| O(10) | 17(1) | 16(1) | 31(2) | 4(1)  | 3(1)  | 6(1)  |

---

### Torsion angles [deg] for 4.

---

|                           |           |
|---------------------------|-----------|
| C(1)-C(2)-C(3)-C(4)       | -26(16)   |
| C(1)-C(2)-C(3)-C(6)       | 153(16)   |
| C(6)-C(3)-C(4)-C(5)       | 0.4(6)    |
| C(2)-C(3)-C(4)-C(5)       | -180.0(4) |
| C(3)-C(4)-C(5)-C(8)       | 1.0(6)    |
| C(4)-C(3)-C(6)-C(7)       | -1.0(6)   |
| C(2)-C(3)-C(6)-C(7)       | 179.3(4)  |
| C(3)-C(6)-C(7)-C(8)       | 0.2(6)    |
| C(6)-C(7)-C(8)-C(5)       | 1.4(6)    |
| C(6)-C(7)-C(8)-N(9)       | -178.3(4) |
| C(4)-C(5)-C(8)-C(7)       | -1.9(6)   |
| C(4)-C(5)-C(8)-N(9)       | 177.7(3)  |
| C(7)-C(8)-N(9)-C(10)#1    | -70.8(5)  |
| C(5)-C(8)-N(9)-C(10)#1    | 109.6(4)  |
| C(7)-C(8)-N(9)-C(10)      | 96.3(4)   |
| C(5)-C(8)-N(9)-C(10)      | -83.4(4)  |
| C(10)#1-N(9)-C(10)-O(10)  | 171.7(3)  |
| C(8)-N(9)-C(10)-O(10)     | 5.4(6)    |
| C(10)#1-N(9)-C(10)-N(9)#2 | -7.2(8)   |
| C(8)-N(9)-C(10)-N(9)#2    | -173.4(3) |

---

Symmetry transformations used to generate equivalent atoms:

#1 -x+y,-x,z #2 -y,x-y,z
